# Supplementary material for: A flexible supercapacitor based on vertically oriented ‘Graphene Forest’ electrodes
Source: Royal Society of Chemistry journal article supplement (doi:10.1039/c5ta05687j), 2015-01-01
Supplement: c5ta05687j1.pdf [file c5ta05687j1.pdf]

## Supporting Information

# Flexible Supercapacitor Based on Vertically Oriented 'Graphene Forest' Electrodes

Yifei Ma,<sup>a§</sup> Mei Wang,<sup>b§</sup> Namhun Kim,<sup>a</sup> Jonghwan Suhr<sup>c</sup> and Heeyeop Chae<sup>ad\*</sup>

<sup>a</sup> School of Chemical Engineering, Sungkyunkwan University, Suwon, 440-746, Republic of Korea.

<sup>b</sup> Department of Energy Science, Integrated Energy Center for Fostering Global Creative Researcher, Sungkyunkwan University, Suwon, 440-746, Republic of Korea.

<sup>c</sup> Department of Polymer Science and Engineering, and Department of Energy Science, Sungkyunkwan University, Suwon, 440-746, Republic of Korea.

<sup>d</sup> SKKU Advanced Institute of Nanotechnology, Sungkyunkwan University, Suwon, 440-746, Republic of Korea.

\*Corresponding Author to: e-mail: hchae@skku.edu, Tel: +82-31-290-7263.

§ These authors contributed equally.

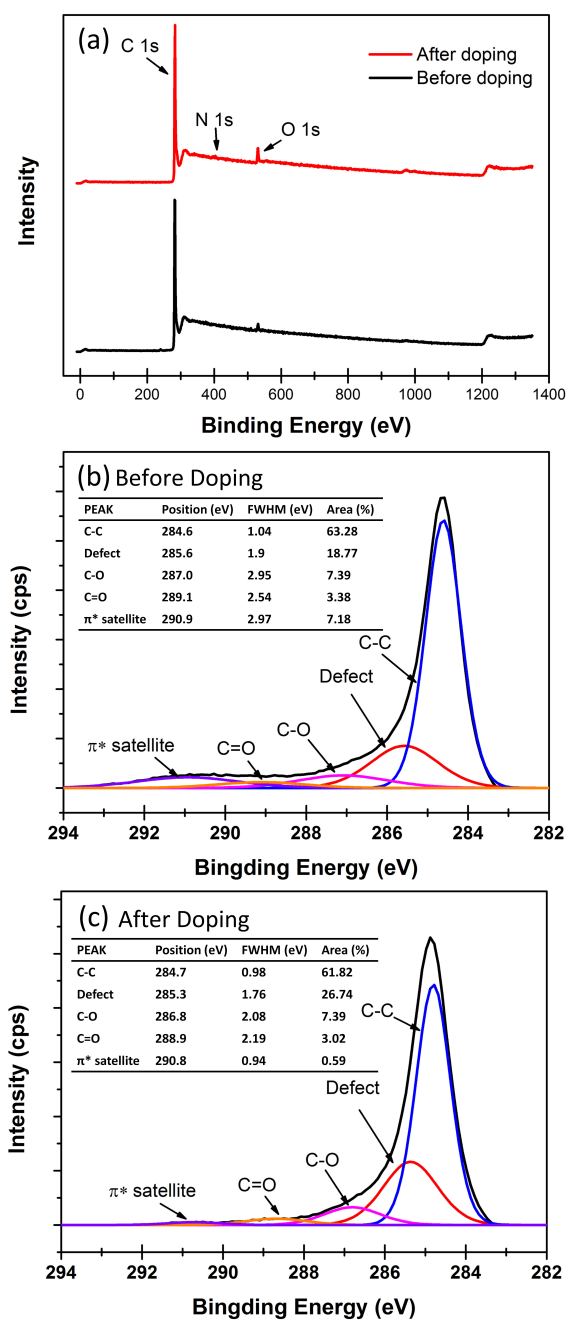

**Figure S1.** (a) XPS survey of graphene forest (GF) before (black line) and after (red line) doping by  $\text{HNO}_3$ . C 1s spectra of GF before (b) and after (c)  $\text{HNO}_3$  doping.

As revealed by the SEM images of GF before and after HNO<sub>3</sub> doping (Figure S2-S3), the GF is robust that the nanostructure is not changed by doping.

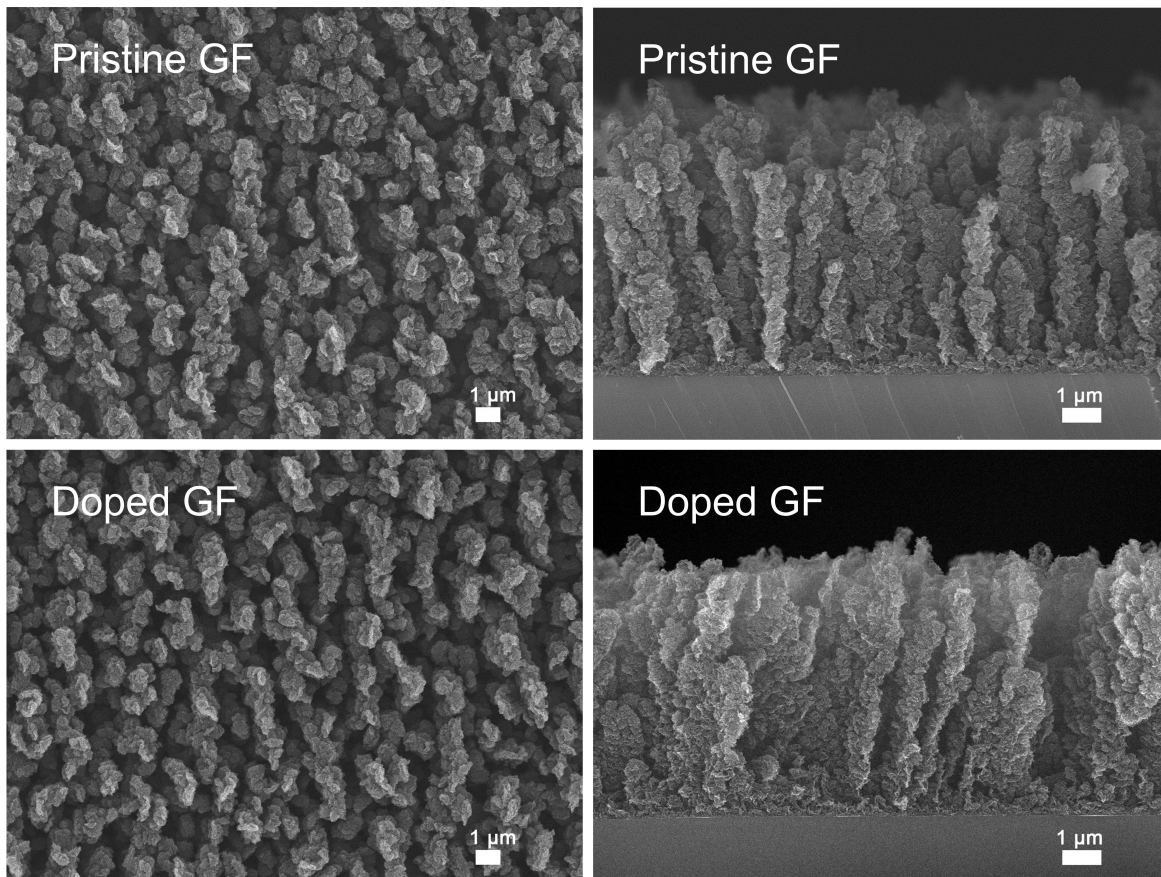

**Figure S2.** SEM images of GF before and after HNO<sub>3</sub> doping. No obvious structure change is observed.

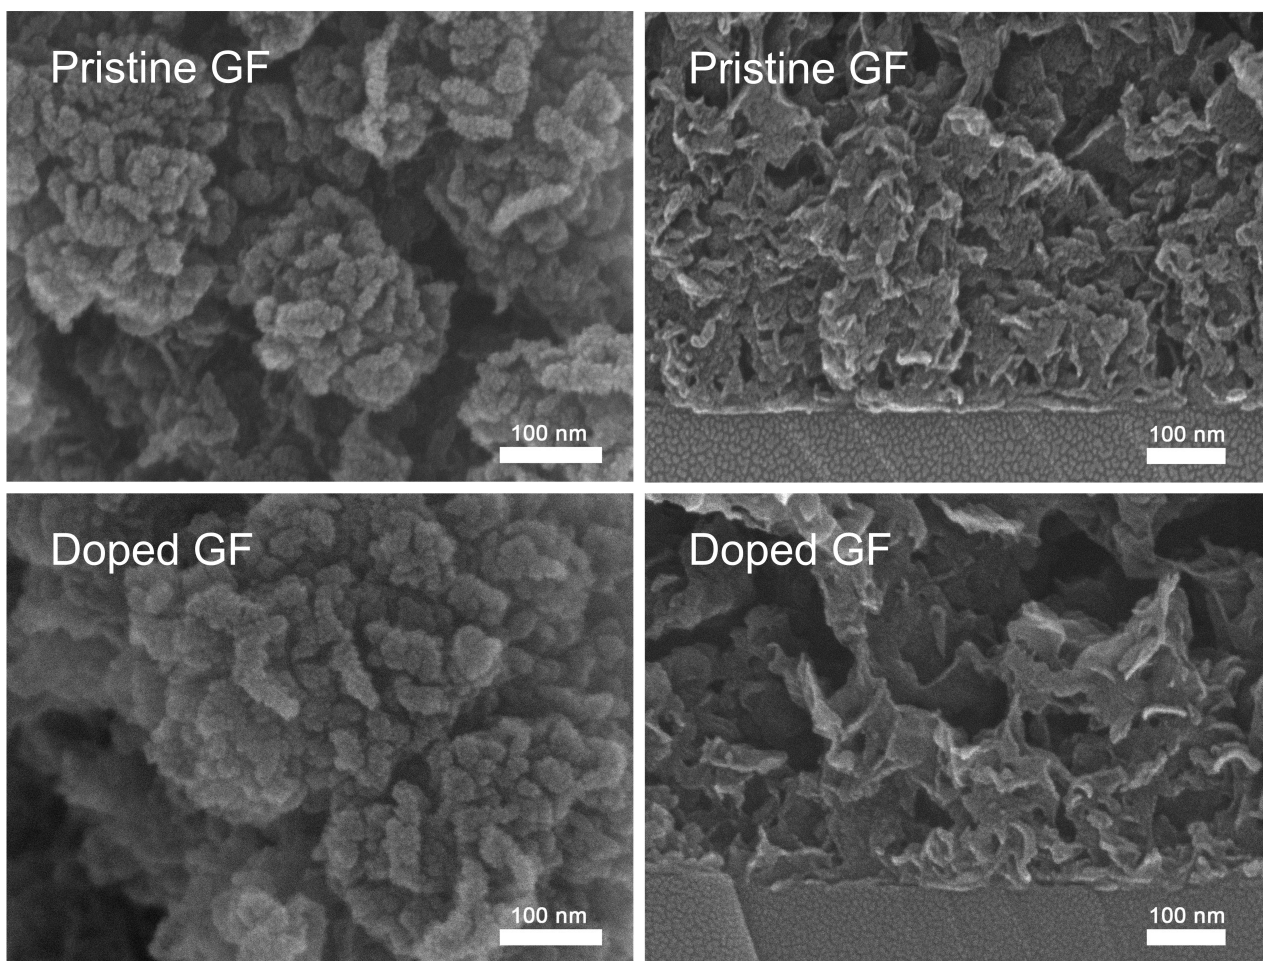

**Figure S3.** Top and cross-sectional SEM images of GF before and after HNO<sub>3</sub> doping.

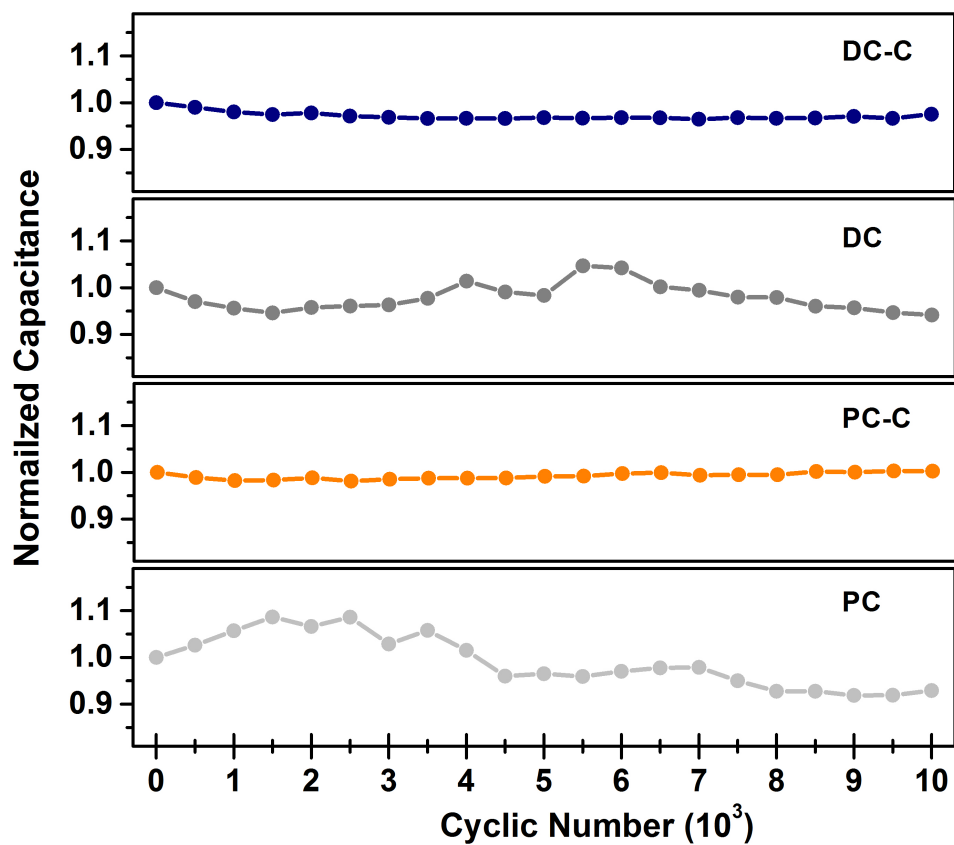

**Figure S4.** Normalized capacitance as a function of charge/discharge cycles at current density of 0.1 mA/cm<sup>2</sup> for four types of EDLCs: pristine EDLC (PC), doped EDLC (DC), PC with current collector (PC-C), DC with current collector (DC-C).

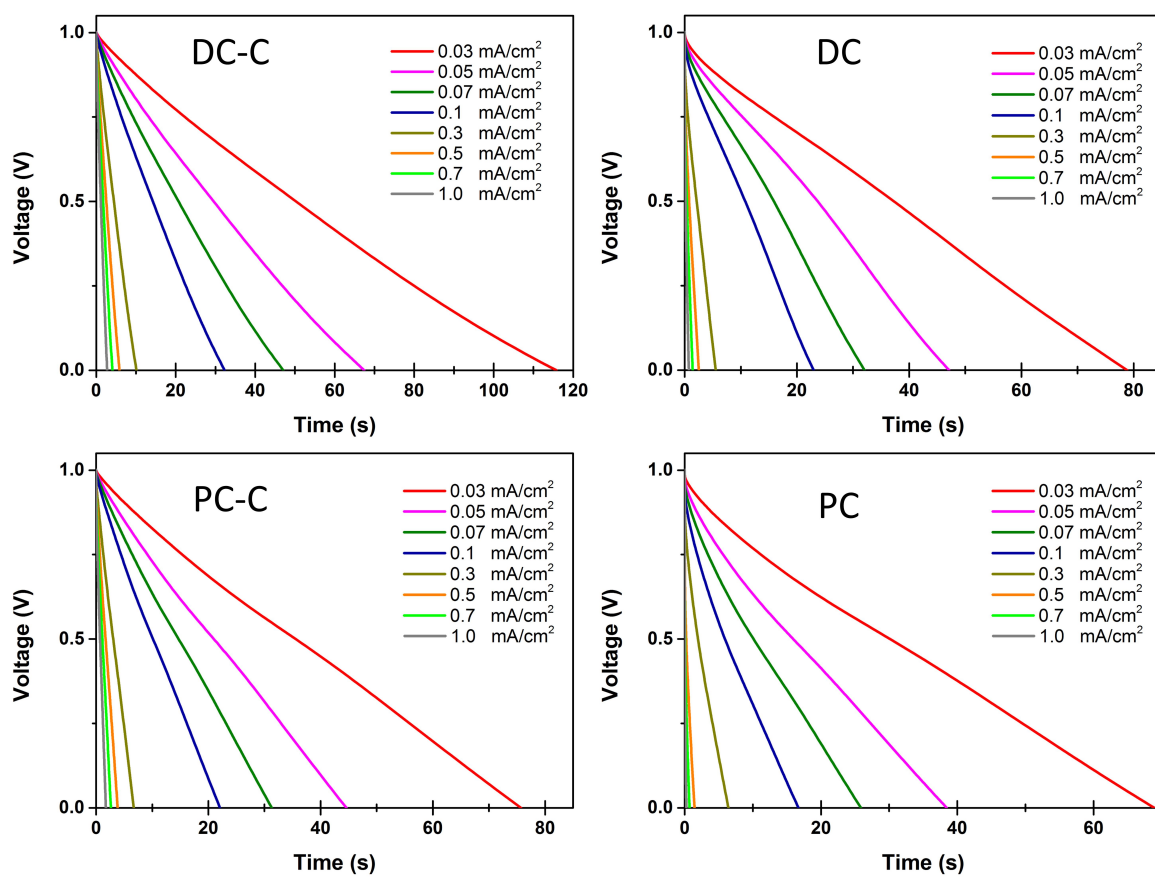

**Figure S5.** Galvanostatic charge/discharge plots at various current densities of four types of EDLCs: pristine EDLC (PC), doped EDLC (DC), PC with current collector (PC-C), DC with current collector (DC-C).

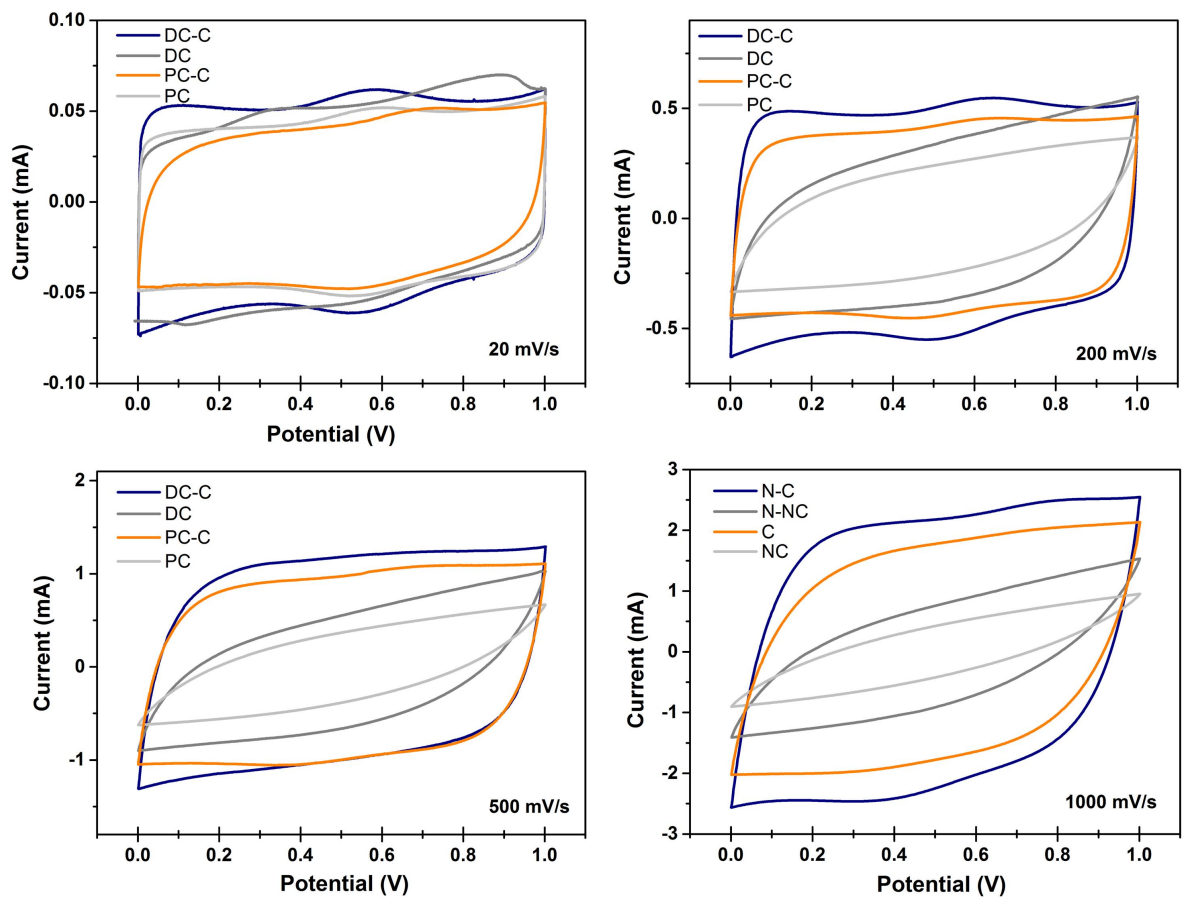

**Figure S6.** Cyclic voltammetry at various scan rates of four types of EDLCs.

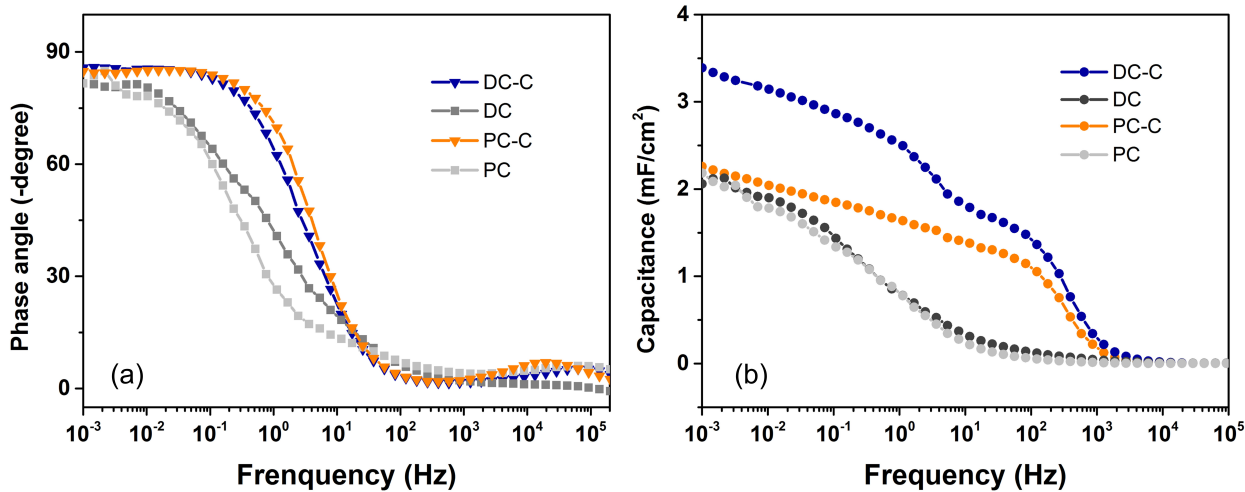

**Figure S7.** Impedance phase angle as functions of frequency (a) and plots of capacitance vs. frequency (b) of DC-C, PC-C, DC and PC.



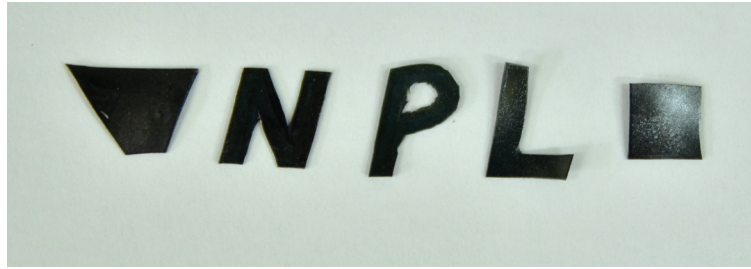

**Figure S8.** Patterned GF/PVA film by simple cutting process.

**Table S1.** Sheet resistance and atomic concentration change of GF before and after HNO<sub>3</sub> doping

|                      | <b>Sheet Resistance</b> | <b>C percent (%)</b> | <b>O percent (%)</b> | <b>N percent (%)</b> |
|----------------------|-------------------------|----------------------|----------------------|----------------------|
| <b>Before doping</b> | 110 Ω/sq                | 98.91                | 0.88                 | 0.21                 |
| <b>After doping</b>  | 96 Ω/sq                 | 96.30                | 3.39                 | 0.31                 |
